# Supplementary material for: Biochar and Organic Fertilizer Co-Application Enhances Soil Carbon Priming Increasing CO2 Fluxes in Two Contrasting Arable Soils
Source: Preprints.org preprint supplement (doi:10.20944/preprints202309.1124.v1), 2023-09-18
Supplement: Supplementary file 3 [file supplementary]

**Supplementary data for the manuscript entitled “The effect of biochar on soil carbon loss – evidence from incubation experiment”**

**Table S1.** Carbon balance in incubated treatments.

| **Treatment** | **C from soil**  [g/100 g] | **C from biochar**  [g/ 100 g soil] | **C from organic amendment**  [g/100 g soil] | **Total C content**  [g/ 100g soil] | **Total measured**  **C-CO2 loss**  [g/ 100g soil] | **Measured C loss in respiration**  **[%]** |
| --- | --- | --- | --- | --- | --- | --- |
| SA  SA BC1  SA BC2  SA BC3  SA BC4  SA BC5  SA BC6  SiL  SiL BC1  SiL BC2  SiL BC3  SiL BC4  SiL BC5  SiL BC6 | 0.721  0.721  0.721  0.721  0.721  0.721  0.721  0.986  0.986  0.986  0.986  0.986  0.986  0.986 | n/a  0.268  0.210  0.366  0.350  0.353  0.512  n/a  0.268  0.210  0.366  0.350  0.353  0.512 | n/a  n/a  n/a  n/a  n/a  n/a  n/a  n/a  n/a  n/a  n/a  n/a  n/a  n/a | 0.721  0.989  0.931  1.087  1.071  1.074  1.233  0.986  1.254  1.196  1.352  1.336  1.339  1.498 | 0.0018  0.0100  0.0039  0.0057  0.0028  0.0023  0.0037  0.0021  0.0065  0.0031  0.0064  0.0035  0.0028  0.0036 | 0.25  1.01  0.42  0.52  0.26  0.22  0.30  0.21  0.52  0.26  0.47  0.26  0.21  0.24 |
| SA + CO  SA + MA  SA + LE  SA BC1 + CO  SA BC1 + MA  SA BC1 + LE  SA BC2 + CO  SA BC2 + MA  SA BC2 + LE  SA BC3 + CO  SA BC3 + MA  SA BC3 + LE  SA BC4 + CO  SA BC4 + MA  SA BC4 + LE  SA BC5 + CO  SA BC5 + MA  SA BC5 + LE  SA BC6 + CO  SA BC6 + MA  SA BC6 + LE | 0.721  0.721  0.721  0.721  0.721  0.721  0.721  0.721  0.721  0.721  0.721  0.721  0.721  0.721  0.721  0.721  0.721  0.721  0.721  0.721  0.721 | n/a  n/a  n/a  0.268  0.268  0.268  0.210  0.210  0.210  0.366  0.366  0.366  0.350  0.350  0.350  0.353  0.353  0.353  0.512  0.512  0.512 | 0.176  0.280  0.163  0.176  0.280  0.163  0.176  0.280  0.163  0.176  0.280  0.163  0.176  0.280  0.163  0.176  0.280  0.163  0.176  0.280  0.163 | 0.90  1.00  0.88  1.17  1.27  1.15  1.11  1.21  1.09  1.26  1.37  1.25  1.25  1.35  1.23  1.25  1.35  1.24  1.41  1.51  1.40 | 0.0027  0.0051  0.0063  0.0085  0.0108  0.0127  0.0034  0.0059  0.0077  0.0068  0.0108  0.0093  0.0029  0.0059  0.0065  0.0031  0.0062  0.0076  0.0031  0.0098  0.0087 | 0.30  0.51  0.71  0.73  0.85  1.10  0.31  0.49  0.71  0.54  0.79  0.75  0.23  0.44  0.53  0.25  0.46  0.61  0.22  0.65  0.62 |
| SiL + CO  SiL + MA  SiL + LE  SiL BC1 + CO  SiL BC1 + MA  SiL BC1 + LE  SiL BC2 + CO  SiL BC2 + MA  SiL BC2 + LE  SiL BC3 + CO  SiL BC3 + MA  SiL BC3 + LE  SiL BC4 + CO  SiL BC4 + MA  SiL BC4 + LE  SiL BC5 + CO  SiL BC5 + MA  SiL BC5 + LE  SiL BC6 + CO  SiL BC6 + MA  SiL BC6 + LE | 0.986  0.986  0.986  0.986  0.986  0.986  0.986  0.986  0.986  0.986  0.986  0.986  0.986  0.986  0.986  0.986  0.986  0.986  0.986  0.986  0.986 | n/a  n/a  n/a  0.268  0.268  0.268  0.210  0.210  0.210  0.366  0.366  0.366  0.350  0.350  0.350  0.353  0.353  0.353  0.512  0.512  0.512 | 0.176  0.280  0.163  0.176  0.280  0.163  0.176  0.280  0.163  0.176  0.280  0.163  0.176  0.280  0.163  0.176  0.280  0.163  0.176  0.280  0.163 | 1.162  1.266  1.149  1.430  1.534  1.417  1.372  1.476  1.358  1.528  1.632  1.514  1.512  1.616  1.498  1.515  1.619  1.501  1.675  1.778  1.661 | 0.0033  0.0041  0.0039  0.0066  0.0065  0.0074  0.0037  0.0068  0.0044  0.0048  0.0078  0.0059  0.0028  0.0053  0.0055  0.0029  0.0049  0.0058  0.0037  0.0057  0.0051 | 0.28  0.33  0.34  0.46  0.42  0.52  0.27  0.46  0.33  0.31  0.48  0.39  0.19  0.33  0.37  0.19  0.30  0.39  0.22  0.32  0.30 |

n/a = not applicable.
